# Supplementary material for: Parietal-Prefrontal Feedforward Connectivity in Association With Schizophrenia Genetic Risk and Delusions
Source: Atypon-hosted journal article supplement (doi:10.1176/appi.ajp.2020.19111176), 2020-05-27
Supplement: appi.ajp.2020.19111176.ds001.pdf [file appi.ajp.2020.19111176.ds001.pdf]

### Supplementary Tables and Figures

**TABLE S1: Working memory engagement in prefrontal and parietal cortices.** T-values of peaks in 31 most engaged regions in the parietal and prefrontal cortex in normal controls (NC, N=143), during working memory (WM) manipulation and maintenance, with corresponding engagement in schizophrenia patients (PT, N=66). All peaks survived  $p < 0.05$  voxelwise whole-brain family-wise (FWE) correction for multiple comparisons. Regions are annotated according to the Human Connectome Project (HCP) parcellations (1). In bold are the left 46 and LIPd regions-of-interest corresponding to previous connectivity findings associated with dysfunctional context updating and delusions (2) that are examined in the independent samples herein.

|                            | SCEF | a24pr | 44-R | IFJp-R | IFSp | 46v  | a1Op | LIPd-R | FOP4-R | AVI-R | AIP  | IP2-R | P10p | a32pr | SFL  | 7PC  | P32pr | 8BM  | 44-L | 47l  | 6r   | IFJa | IFJp-L | p9-46v | <b>46</b>   | <b>LIPd-L</b> | FOP4-L | AVI-L | Pft  | IP2-L | FOP5 |
|----------------------------|------|-------|------|--------|------|------|------|--------|--------|-------|------|-------|------|-------|------|------|-------|------|------|------|------|------|--------|--------|-------------|---------------|--------|-------|------|-------|------|
| T-values (NC-manipulation) | 27.5 | 20.1  | 20.7 | 19.4   | 20.2 | 22.0 | 7.6  | 16.5   | 17.7   | 24.5  | 18.5 | 22.7  | 12.7 | 21.4  | 26.5 | 24.7 | 21.9  | 24.7 | 23.9 | 24.0 | 28.3 | 24.9 | 23.7   | 22.3   | <b>14.9</b> | <b>24.61</b>  | 19.94  | 25.8  | 26.4 | 25.9  | 21.1 |
| T-values (NC-maintenance)  | 18.9 | 15.0  | 13.9 | 12.9   | 10.5 | 11.4 | 4.6  | 15.2   | 14.9   | 17.1  | 16.7 | 17.2  | 8.3  | 14.2  | 15.6 | 24.7 | 16.3  | 13.2 | 13.1 | 13.8 | 19.3 | 15.3 | 15.8   | 14.3   | <b>11.2</b> | <b>21.27</b>  | 14.77  | 16.7  | 27.1 | 26.2  | 14.8 |
| T-values (PT-manipulation) | 12.5 | 7.6   | 8.4  | 8.4    | 8.1  | 9.8  | 4.5  | 9.9    | 7.2    | 9.9   | 11.9 | 12.2  | 3.1  | 8.3   | 10.7 | 13.5 | 11.2  | 9.5  | 11.7 | 7.6  | 13.1 | 11.7 | 10.4   | 9.0    | <b>4.9</b>  | <b>12.95</b>  | 6.91   | 8.4   | 13.5 | 13.9  | 6.9  |
| T-values (PT-maintenance)  | 14.8 | 11.5  | 7.2  | 6.2    | 5.0  | 6.0  | 4.0  | 10.6   | 7.3    | 8.0   | 11.6 | 10.4  | 2.4  | 8.3   | 10.0 | 17.1 | 16.6  | 8.8  | 7.0  | 7.6  | 11.0 | 7.7  | 9.6    | 5.8    | <b>4.2</b>  | <b>13.56</b>  | 6.90   | 8.2   | 15.9 | 16.3  | 7.8  |

**TABLE S2: Effective connectivity (DCM) for controls (N=143) during WM manipulation.** T-values of effective connectivity across the 31 cortical parcels most engaged during WM manipulation. Rows represent connectivity “to” that region, while columns represent connectivity “from” that region. Regions are annotated according to the Human Connectome Project (HCP) parcellations(1). In bold are the left 46 and LIPd regions-of.-interest corresponding to previous connectivity findings associated with dysfunctional context updating and delusions(2) that are examined in the independent samples herein.

|         | SCEF | a24pr | 44 – R | IFJp –R | IFSp | 46v  | a10p | LIPd –R | FOP4 –R | AVI –R | AIP  | IP2 –R | P10p | a32pr | SFL  | 7PC  | P32pr | 8BM  | 44 – L | 47l  | 6r   | IFJa | IFJp –L | p9-46v | 46   | LIPd –L | FOP4 –L | AVI –L | Pft  | IP2 –L | FOP5 |
|---------|------|-------|--------|---------|------|------|------|---------|---------|--------|------|--------|------|-------|------|------|-------|------|--------|------|------|------|---------|--------|------|---------|---------|--------|------|--------|------|
| SCEF    | NaN  | 10.7  | 16.1   | 12.8    | 13.4 | 13.4 | 6.5  | 11.9    | 14.2    | 14.9   | 13.1 | 14.6   | 7.9  | 11.1  | 15.3 | 13.7 | 12.6  | 13.4 | 14.7   | 12.8 | 15.2 | 14.3 | 14.8    | 13.1   | 10.8 | 14.3    | 14.0    | 15.5   | 11.9 | 14.8   | 12.4 |
| a24pr   | 8.5  | NaN   | 10.5   | 9.9     | 10.9 | 10.6 | 7.2  | 10.0    | 10.5    | 9.9    | 9.9  | 11.1   | 9.1  | 11.9  | 9.6  | 10.6 | 11.2  | 6.9  | 8.8    | 10.5 | 8.8  | 10.0 | 10.2    | 9.6    | 10.5 | 10.1    | 10.9    | 10.4   | 10.5 | 10.5   | 11.8 |
| 44 – R  | 13.8 | 12.0  | NaN    | 13.8    | 13.4 | 13.5 | 8.7  | 12.3    | 15.0    | 13.8   | 12.8 | 14.3   | 9.9  | 12.2  | 13.9 | 13.8 | 12.0  | 12.7 | 14.1   | 14.1 | 12.7 | 13.5 | 13.4    | 12.7   | 12.3 | 12.6    | 12.9    | 15.0   | 12.4 | 13.0   | 13.4 |
| IFJp –R | 11.0 | 10.8  | 11.2   | NaN     | 11.6 | 10.8 | 7.7  | 10.3    | 11.6    | 10.6   | 11.2 | 11.0   | 10.6 | 10.5  | 10.8 | 11.1 | 10.1  | 9.9  | 10.6   | 10.4 | 9.7  | 10.7 | 10.4    | 10.5   | 11.3 | 10.6    | 11.2    | 10.0   | 9.9  | 10.8   | 11.5 |
| IFSp    | 9.9  | 11.6  | 12.4   | 12.1    | NaN  | 12.1 | 8.9  | 11.5    | 12.7    | 11.6   | 11.6 | 11.7   | 10.1 | 11.7  | 11.1 | 11.1 | 11.3  | 10.6 | 10.7   | 11.9 | 9.7  | 11.0 | 10.9    | 11.4   | 11.3 | 11.4    | 12.3    | 12.2   | 11.2 | 10.9   | 12.9 |
| 46v     | 12.2 | 12.7  | 14.7   | 12.9    | 14.6 | NaN  | 9.1  | 12.4    | 13.7    | 14.3   | 12.8 | 13.7   | 9.5  | 13.7  | 13.2 | 13.4 | 12.6  | 13.2 | 10.2   | 13.1 | 11.4 | 12.5 | 12.5    | 13.8   | 12.9 | 13.7    | 11.5    | 14.0   | 12.3 | 12.8   | 13.3 |
| a10p    | 6.3  | 4.0   | 7.6    | 7.2     | 4.8  | 3.6  | NaN  | 4.5     | 8.2     | 7.3    | 3.9  | 7.6    | 7.5  | 4.5   | 7.0  | 4.7  | 7.6   | 3.6  | 6.8    | 3.8  | 6.5  | 3.3  | 4.0     | 7.4    | 3.6  | 4.3     | 3.9     | 4.5    | 7.5  | 6.7    | 4.4  |
| LIPd –R | 10.0 | 9.9   | 10.4   | 10.4    | 10.2 | 9.7  | 7.7  | NaN     | 11.0    | 9.8    | 11.9 | 10.7   | 9.6  | 9.8   | 9.6  | 10.3 | 9.8   | 9.7  | 9.9    | 10.6 | 8.8  | 9.6  | 9.8     | 9.7    | 10.2 | 10.2    | 10.6    | 10.5   | 10.3 | 9.8    | 10.7 |
| FOP4 –R | 10.9 | 9.6   | 11.7   | 11.3    | 11.0 | 10.9 | 7.5  | 10.9    | NaN     | 11.0   | 10.4 | 11.0   | 10.4 | 10.0  | 10.6 | 10.9 | 10.5  | 9.1  | 10.9   | 11.0 | 10.5 | 10.8 | 10.2    | 10.5   | 10.5 | 10.1    | 11.9    | 11.5   | 11.2 | 10.0   | 12.3 |
| AVI –R  | 12.3 | 10.7  | 13.7   | 11.9    | 12.0 | 12.5 | 8.4  | 11.4    | 14.3    | NaN    | 10.6 | 11.9   | 8.4  | 11.5  | 12.4 | 12.1 | 11.8  | 11.3 | 10.0   | 12.8 | 11.4 | 12.9 | 12.7    | 12.5   | 11.6 | 12.3    | 13.9    | 14.7   | 11.8 | 12.6   | 13.5 |
| AIP     | 10.8 | 10.1  | 11.1   | 11.5    | 11.0 | 10.8 | 8.2  | 13.5    | 11.6    | 10.3   | NaN  | 11.7   | 8.8  | 10.7  | 9.5  | 11.5 | 10.2  | 10.1 | 10.5   | 11.1 | 10.1 | 10.1 | 10.8    | 11.0   | 10.8 | 11.5    | 11.0    | 11.2   | 11.6 | 10.8   | 12.0 |
| IP2 –R  | 13.6 | 13.2  | 14.4   | 12.7    | 13.5 | 12.7 | 8.7  | 13.6    | 14.1    | 13.2   | 14.0 | NaN    | 9.6  | 13.8  | 12.4 | 12.6 | 12.2  | 13.2 | 12.3   | 13.2 | 10.6 | 12.5 | 12.2    | 13.4   | 13.1 | 13.8    | 13.6    | 13.5   | 12.2 | 11.8   | 12.1 |
| P10p    | 8.0  | 9.6   | 8.3    | 9.4     | 8.3  | 7.9  | 7.4  | 9.8     | 10.1    | 8.7    | 8.8  | 9.6    | NaN  | 9.3   | 7.4  | 8.9  | 9.1   | 7.4  | 6.8    | 8.1  | 6.4  | 8.2  | 9.4     | 7.3    | 7.4  | 8.8     | 8.4     | 7.7    | 9.2  | 6.4    | 10.0 |
| a32pr   | 8.7  | 12.6  | 10.8   | 10.9    | 11.5 | 11.1 | 8.2  | 11.1    | 11.0    | 10.6   | 10.9 | 11.4   | 9.7  | NaN   | 10.1 | 11.3 | 11.2  | 9.9  | 8.8    | 10.8 | 9.1  | 9.7  | 10.3    | 10.8   | 11.4 | 10.5    | 11.3    | 11.3   | 10.7 | 10.6   | 12.4 |
| SFL     | 13.6 | 11.6  | 14.4   | 12.2    | 12.1 | 13.0 | 7.8  | 11.8    | 13.4    | 13.4   | 11.6 | 13.6   | 7.9  | 12.3  | NaN  | 14.0 | 12.5  | 14.4 | 13.9   | 12.0 | 14.1 | 13.6 | 14.1    | 13.6   | 11.2 | 13.9    | 13.3    | 14.2   | 12.2 | 14.0   | 12.4 |
| 7PC     | 12.3 | 11.2  | 14.2   | 12.2    | 11.6 | 11.7 | 8.8  | 12.7    | 13.2    | 12.6   | 14.1 | 13.7   | 9.0  | 12.8  | 13.2 | NaN  | 12.5  | 12.2 | 13.1   | 11.9 | 12.6 | 13.3 | 12.6    | 11.3   | 14.3 | 14.5    | 13.7    | 13.2   | 13.0 | 12.7   | 8.0  |
| P32pr   | 10.2 | 12.4  | 11.6   | 11.1    | 11.5 | 11.0 | 7.5  | 11.0    | 11.8    | 11.1   | 10.8 | 11.9   | 9.7  | 11.6  | 10.8 | 13.7 | NaN   | 10.5 | 11.2   | 10.7 | 10.8 | 11.0 | 10.6    | 10.2   | 11.2 | 10.2    | 11.6    | 10.6   | 11.0 | 11.0   | 11.1 |
| 8BM     | 12.9 | 10.9  | 13.5   | 11.9    | 12.0 | 13.4 | 7.8  | 11.8    | 12.8    | 12.5   | 12.2 | 13.7   | 7.5  | 12.6  | 14.4 | 13.0 | 12.7  | NaN  | 12.7   | 12.9 | 11.6 | 12.2 | 13.5    | 13.6   | 10.8 | 13.3    | 12.7    | 13.7   | 12.3 | 13.6   | 12.2 |

|        |      |      |      |      |      |      |     |      |      |      |      |      |      |      |      |      |      |      |      |      |      |      |      |      |             |             |      |      |      |      |      |
|--------|------|------|------|------|------|------|-----|------|------|------|------|------|------|------|------|------|------|------|------|------|------|------|------|------|-------------|-------------|------|------|------|------|------|
| 44 -L  | 14.1 | 11.1 | 15.4 | 13.4 | 13.1 | 13.5 | 8.0 | 12.2 | 14.5 | 15.7 | 13.1 | 13.5 | 8.6  | 12.0 | 9.4  | 12.4 | 11.3 | 13.3 | NaN  | 11.6 | 13.3 | 14.3 | 13.5 | 13.3 | 11.6        | 13.5        | 14.1 | 11.8 | 13.1 | 13.9 | 14.0 |
| 47I    | 10.6 | 11.6 | 12.5 | 11.4 | 12.1 | 11.2 | 8.2 | 11.4 | 13.1 | 11.3 | 11.2 | 11.6 | 8.8  | 9.7  | 10.1 | 13.6 | 12.3 | 11.3 | 11.5 | NaN  | 11.3 | 11.2 | 12.8 | 11.7 | 9.3         | 11.8        | 13.8 | 13.7 | 12.5 | 10.9 | 12.3 |
| 6r     | 15.5 | 10.5 | 15.9 | 12.8 | 12.4 | 12.9 | 7.1 | 11.6 | 13.5 | 13.9 | 11.8 | 12.5 | 7.3  | 11.7 | 14.8 | 13.2 | 11.9 | 13.1 | 14.2 | 13.2 | NaN  | 14.2 | 15.5 | 11.5 | 14.0        | 15.3        | 14.7 | 13.2 | 14.8 | 11.3 | 11.3 |
| IFJa   | 13.0 | 11.3 | 14.5 | 13.6 | 13.1 | 12.6 | 7.3 | 11.6 | 14.4 | 14.0 | 12.1 | 13.3 | 8.9  | 11.5 | 13.6 | 13.3 | 11.9 | 12.5 | 13.6 | 13.5 | 12.1 | NaN  | 12.9 | 13.1 | 12.0        | 14.0        | 13.2 | 14.0 | 12.8 | 13.6 | 13.6 |
| IFJp-L | 13.4 | 11.9 | 14.3 | 12.9 | 12.0 | 12.6 | 8.6 | 12.2 | 13.0 | 13.2 | 12.0 | 12.6 | 9.4  | 12.1 | 13.3 | 13.0 | 11.5 | 12.8 | 12.3 | 13.5 | 12.8 | 12.4 | NaN  | 13.3 | 12.4        | 14.7        | 13.8 | 14.3 | 12.2 | 12.2 | 12.6 |
| p9-46v | 12.0 | 11.3 | 13.8 | 13.2 | 13.3 | 13.6 | 8.0 | 11.6 | 13.1 | 13.1 | 12.6 | 13.4 | 9.6  | 12.1 | 13.1 | 11.1 | 10.6 | 12.9 | 9.1  | 13.1 | 8.7  | 12.3 | 12.4 | NaN  | 12.1        | 12.9        | 12.9 | 13.6 | 13.5 | 13.0 | 12.1 |
| 46     | 9.4  | 11.1 | 11.5 | 11.6 | 11.8 | 11.1 | 8.3 | 10.9 | 12.1 | 11.0 | 11.0 | 11.0 | 9.9  | 11.1 | 10.5 | 13.4 | 11.4 | 10.4 | 9.8  | 11.0 | 11.0 | 10.1 | 9.7  | 9.8  | NaN         | <u>10.7</u> | 10.1 | 11.7 | 10.6 | 10.6 | 12.2 |
| LIPd-L | 12.2 | 11.1 | 11.9 | 12.5 | 11.9 | 12.1 | 8.6 | 12.1 | 12.9 | 13.2 | 12.4 | 13.2 | 10.1 | 11.8 | 12.3 | 15.0 | 12.2 | 11.8 | 11.5 | 12.5 | 13.1 | 12.0 | 12.1 | 12.3 | <u>12.2</u> | NaN         | 12.7 | 12.8 | 12.7 | 12.0 | 12.5 |
| FOP4-L | 10.9 | 10.7 | 11.1 | 10.7 | 11.8 | 10.8 | 7.9 | 11.3 | 13.2 | 11.8 | 10.1 | 11.3 | 8.3  | 11.4 | 11.0 | 12.2 | 11.8 | 10.1 | 10.6 | 12.7 | 11.3 | 10.9 | 11.6 | 11.3 | 9.9         | 11.3        | NaN  | 12.3 | 10.7 | 10.5 | 12.9 |
| AVI-L  | 11.4 | 11.4 | 13.1 | 11.1 | 12.7 | 12.0 | 8.5 | 11.6 | 13.5 | 13.9 | 11.3 | 12.4 | 9.0  | 12.5 | 11.7 | 13.6 | 11.8 | 11.8 | 12.2 | 13.9 | 12.1 | 12.0 | 12.4 | 12.2 | 12.2        | 12.1        | 14.5 | NaN  | 11.8 | 11.8 | 13.6 |
| Pft    | 11.5 | 11.7 | 12.0 | 11.2 | 11.6 | 10.9 | 8.3 | 12.2 | 13.4 | 11.5 | 13.4 | 12.1 | 10.0 | 12.8 | 11.3 | 15.4 | 12.2 | 11.9 | 11.6 | 13.5 | 13.7 | 12.0 | 11.4 | 13.0 | 11.3        | 12.7        | 12.1 | 12.2 | NaN  | 10.8 | 13.9 |
| IP2-L  | 14.6 | 12.1 | 15.1 | 13.5 | 12.6 | 13.8 | 7.8 | 12.9 | 13.8 | 15.2 | 13.6 | 14.9 | 8.8  | 13.2 | 15.0 | 10.6 | 12.2 | 14.7 | 12.2 | 14.1 | 8.5  | 13.6 | 13.6 | 14.7 | 12.8        | 15.2        | 14.0 | 15.3 | 13.6 | NaN  | 13.6 |
| FOP5   | 9.3  | 10.6 | 10.0 | 10.4 | 10.5 | 10.1 | 8.1 | 9.9  | 11.2 | 10.2 | 9.7  | 10.1 | 9.4  | 11.0 | 9.6  | 11.1 | 8.9  | 8.5  | 9.4  | 11.4 | 8.5  | 10.1 | 10.0 | 9.5  | 10.1        | 10.2        | 11.3 | 10.9 | 10.7 | 9.9  | NaN  |

**TABLE S3: Effective connectivity (DCM) for controls (N=143) during WM maintenance.** T-values of effective connectivity across the 31 cortical parcels most engaged during WM maintenance. Rows represent connectivity “to” that region, while columns represent connectivity “from” that region. Regions are annotated according to the Human Connectome Project (HCP) parcellations (1).

|        | SCEF | a24pr | 44-R | IFJp-R | IFSp | 46v  | a10p | LIPd-R | FOP4-R | AVI-R | AIP | IP2-R | P10p | a32pr | SFL | 7PC | P32pr | 8BM | 44-L | 47l | 6r  | IFJa | IFJp-L | p9-46v | 46  | LIPd-L | FOP4-L | AVI-L | Pft  | IP2-L | FOP5 |
|--------|------|-------|------|--------|------|------|------|--------|--------|-------|-----|-------|------|-------|-----|-----|-------|-----|------|-----|-----|------|--------|--------|-----|--------|--------|-------|------|-------|------|
| SCEF   | NaN  | 9.2   | 3.8  | 4.5    | 6.6  | 8.3  | 4.1  | 8.1    | 8.6    | 7.7   | 9.3 | 9.7   | 6.9  | 8.1   | 8.5 | 9.3 | 9.6   | 5.7 | 9.5  | 7.7 | 6.3 | 7.8  | 7.0    | 9.0    | 9.1 | 8.2    | 10.0   | 8.4   | 8.9  | 10.0  | 9.8  |
| a24pr  | 8.0  | NaN   | 3.3  | 4.7    | 6.4  | 5.6  | 4.4  | 7.5    | 7.2    | 8.4   | 7.8 | 8.3   | 5.0  | 7.2   | 7.3 | 8.2 | 6.9   | 6.4 | 6.9  | 7.3 | 7.2 | 7.3  | 6.7    | 5.6    | 6.9 | 8.0    | 8.6    | 7.2   | 6.6  | 8.4   | 3.6  |
| 44-R   | 6.5  | 6.7   | NaN  | 3.9    | 4.5  | 5.5  | 4.7  | 8.3    | 4.7    | 7.4   | 8.2 | 8.5   | 7.4  | 7.8   | 6.2 | 7.4 | 4.6   | 6.9 | 8.8  | 7.2 | 6.3 | 6.3  | 4.3    | 6.6    | 8.0 | 7.7    | 9.1    | 6.5   | 7.8  | 7.8   | 7.9  |
| IFJp-R | 1.9  | 3.8   | 3.5  | NaN    | 3.6  | 3.9  | 2.7  | 4.5    | 5.4    | 2.7   | 4.1 | 5.4   | 1.6  | 1.6   | 1.9 | 4.3 | 4.2   | 3.8 | 4.5  | 2.9 | 2.0 | 1.1  | 5.9    | 5.8    | 4.2 | 3.5    | 3.1    | 4.4   | 3.1  | 4.1   | 5.8  |
| IFSp   | 6.5  | 5.9   | 7.0  | 1.6    | NaN  | 6.5  | 4.8  | 5.8    | 6.2    | 5.1   | 4.5 | 7.2   | 6.7  | 5.0   | 6.1 | 6.9 | 6.4   | 6.3 | 3.4  | 4.2 | 5.4 | 5.9  | 6.3    | 4.1    | 6.8 | 6.3    | 5.9    | 4.0   | 6.5  | 6.8   | 7.0  |
| 46v    | 8.0  | 6.6   | 8.6  | 5.9    | 8.3  | NaN  | 5.8  | 8.2    | 8.0    | 5.3   | 9.5 | 8.9   | 7.8  | 5.5   | 7.9 | 8.5 | 7.3   | 7.8 | 7.0  | 5.0 | 5.8 | 8.4  | 9.0    | 8.5    | 9.2 | 8.7    | 6.9    | 7.6   | 8.6  | 8.3   | 7.3  |
| a10p   | 3.6  | 4.5   | 5.1  | 4.1    | 5.6  | 5.6  | NaN  | 5.8    | 4.8    | 6.1   | 5.9 | 5.8   | 6.3  | 4.8   | 5.1 | 5.9 | 5.8   | 4.9 | 5.0  | 5.5 | 4.5 | 5.1  | 5.1    | 5.4    | 6.3 | 5.7    | 5.3    | 4.9   | 6.1  | 5.8   | 5.7  |
| LIPd-R | 4.9  | 6.6   | 3.7  | 4.2    | 6.8  | 7.4  | 5.2  | NaN    | 7.6    | 6.8   | 5.7 | 7.9   | 6.3  | 6.0   | 5.2 | 7.0 | 7.3   | 5.8 | 6.9  | 7.9 | 5.5 | 5.3  | 5.0    | 7.5    | 6.8 | 6.2    | 7.3    | 7.2   | 4.0  | 7.2   | 7.8  |
| FOP4-R | 7.0  | 8.2   | 7.7  | 1.9    | 6.2  | 6.5  | 3.9  | 8.2    | NaN    | 2.9   | 2.8 | 2.8   | 6.6  | 7.6   | 5.9 | 2.6 | 5.9   | 4.6 | 7.6  | 6.9 | 4.9 | 4.9  | 6.3    | 6.4    | 3.7 | 8.0    | 3.1    | 8.4   | 7.8  | 2.8   | 3.5  |
| AVI-R  | 8.6  | 7.9   | 8.3  | 2.2    | 6.1  | 4.7  | 5.9  | 8.3    | 9.8    | NaN   | 7.1 | 7.9   | 6.3  | 7.1   | 4.9 | 7.7 | 7.8   | 6.1 | 6.1  | 7.5 | 5.7 | 2.8  | 5.8    | 7.9    | 7.7 | 4.7    | 8.9    | 5.8   | 7.8  | 5.4   | 9.1  |
| AIP    | 6.1  | 7.4   | 5.2  | 5.3    | 7.6  | 8.8  | 5.3  | 9.8    | 7.2    | 7.1   | NaN | 9.2   | 7.1  | 3.5   | 6.0 | 8.4 | 8.2   | 3.1 | 6.6  | 7.9 | 3.3 | 2.8  | 7.1    | 8.7    | 7.4 | 7.9    | 8.2    | 7.5   | 7.8  | 7.7   | 8.2  |
| IP2-R  | 6.5  | 7.7   | 8.5  | 3.6    | 3.9  | 8.5  | 4.2  | 9.8    | 6.8    | 8.0   | 4.5 | NaN   | 2.8  | 3.2   | 5.7 | 8.3 | 8.2   | 3.1 | 5.8  | 8.2 | 4.3 | 2.5  | 6.6    | 4.9    | 5.0 | 4.1    | 8.2    | 5.9   | 8.9  | 7.8   | 8.8  |
| P10p   | 5.9  | 4.1   | 6.6  | 5.2    | 7.1  | 6.8  | 6.2  | 7.1    | 6.3    | 6.3   | 7.3 | 6.8   | NaN  | 5.5   | 3.2 | 6.3 | 6.4   | 4.7 | 6.2  | 5.8 | 4.6 | 7.4  | 7.3    | 7.2    | 7.8 | 6.1    | 6.9    | 5.7   | 6.5  | 6.3   | 2.3  |
| a32pr  | 6.5  | 6.2   | 7.8  | 5.7    | 3.1  | 5.6  | 4.8  | 6.7    | 5.5    | 5.9   | 7.1 | 7.6   | 5.6  | NaN   | 6.7 | 7.6 | 6.4   | 7.4 | 5.7  | 5.6 | 5.6 | 6.8  | 6.2    | 6.3    | 7.4 | 5.7    | 7.6    | 6.5   | 7.2  | 7.1   | 3.1  |
| SFL    | 8.1  | 6.1   | 7.4  | 2.5    | 6.3  | 6.5  | 5.3  | 6.8    | 3.7    | 6.1   | 8.1 | 5.9   | 6.2  | 6.4   | NaN | 8.0 | 7.3   | 4.8 | 7.6  | 7.0 | 4.6 | 6.6  | 6.2    | 7.2    | 8.0 | 4.2    | 7.3    | 6.1   | 8.5  | 7.5   | 7.7  |
| 7PC    | 9.2  | 9.9   | 7.1  | 6.4    | 9.4  | 10.7 | 6.8  | 9.0    | 8.3    | 10.0  | 8.4 | 11.4  | 7.9  | 8.4   | 9.3 | NaN | 8.6   | 8.5 | 8.6  | 9.4 | 9.7 | 8.7  | 8.2    | 9.9    | 7.9 | 11.3   | 8.7    | 8.3   | 10.1 | 12.2  | 7.3  |
| P32pr  | 7.2  | 6.7   | 3.1  | 3.6    | 4.4  | 6.4  | 5.7  | 7.9    | 6.4    | 3.8   | 9.0 | 8.8   | 6.1  | 7.1   | 6.0 | 7.4 | NaN   | 5.9 | 8.2  | 7.7 | 6.3 | 4.4  | 5.0    | 7.1    | 7.6 | 7.1    | 8.1    | 4.6   | 7.0  | 7.5   | 6.3  |
| 8BM    | 7.8  | 6.5   | 8.4  | 1.6    | 3.4  | 7.5  | 3.7  | 6.8    | 3.9    | 4.4   | 7.1 | 7.9   | 5.0  | 5.0   | 7.6 | 7.3 | 6.1   | NaN | 6.9  | 6.7 | 7.8 | 5.3  | 2.8    | 4.0    | 6.9 | 5.7    | 7.1    | 6.4   | 8.2  | 6.4   | 7.5  |
| 44-L   | 8.3  | 7.4   | 9.0  | 5.1    | 6.2  | 8.0  | 4.9  | 3.8    | 6.8    | 6.7   | 3.5 | 3.9   | 6.5  | 3.4   | 4.8 | 6.8 | 6.8   | 3.2 | NaN  | 8.9 | 6.7 | 6.5  | 7.5    | 8.3    | 7.2 | 3.9    | 8.6    | 6.8   | 7.5  | 3.6   | 8.0  |
| 47l    | 7.5  | 7.5   | 8.3  | 4.1    | 5.3  | 5.4  | 5.5  | 6.7    | 7.5    | 8.4   | 7.0 | 8.1   | 6.0  | 7.1   | 7.6 | 7.3 | 7.3   | 6.5 | 8.6  | NaN | 6.6 | 7.5  | 7.0    | 7.4    | 7.0 | 7.1    | 9.3    | 6.7   | 8.0  | 5.3   | 8.4  |
| 6r     | 6.0  | 5.8   | 6.5  | 4.5    | 3.8  | 7.2  | 3.5  | 7.0    | 4.7    | 6.1   | 5.8 | 6.7   | 5.3  | 3.1   | 5.5 | 7.2 | 5.5   | 3.2 | 8.3  | 8.5 | NaN | 8.3  | 6.7    | 4.9    | 8.5 | 5.3    | 7.7    | 4.4   | 6.4  | 6.0   | 7.8  |
| IFJa   | 5.7  | 6.3   | 5.2  | 1.6    | 7.2  | 7.2  | 3.9  | 6.0    | 4.9    | 4.8   | 6.2 | 7.6   | 3.0  | 3.1   | 0.8 | 6.6 | 4.0   | 1.3 | 7.8  | 6.9 | 3.0 | NaN  | 7.5    | 3.7    | 7.8 | 5.8    | 7.1    | 5.8   | 6.6  | 5.6   | 7.3  |
| IFJp-L | 3.9  | 5.7   | 4.3  | 3.0    | 6.1  | 6.5  | 3.5  | 6.7    | 6.3    | 4.5   | 5.7 | 7.3   | 2.7  | 6.1   | 2.3 | 4.9 | 5.1   | 2.9 | 5.1  | 6.7 | 2.0 | 3.4  | NaN    | 7.3    | 6.1 | 5.1    | 4.3    | 6.2   | 4.5  | 6.1   | 7.2  |

|        |     |     |     |     |     |     |     |      |     |     |     |      |     |     |     |      |     |     |     |     |     |     |     |      |      |      |      |     |      |      |     |
|--------|-----|-----|-----|-----|-----|-----|-----|------|-----|-----|-----|------|-----|-----|-----|------|-----|-----|-----|-----|-----|-----|-----|------|------|------|------|-----|------|------|-----|
| p9-46v | 5.9 | 7.9 | 8.3 | 7.6 | 7.9 | 8.2 | 5.3 | 8.2  | 6.9 | 8.5 | 7.9 | 8.7  | 7.6 | 7.7 | 6.7 | 7.7  | 6.7 | 6.2 | 7.5 | 7.6 | 6.9 | 7.1 | 8.7 | NaN  | 8.9  | 7.2  | 8.4  | 7.8 | 10.0 | 9.1  | 8.3 |
| 46     | 7.3 | 7.0 | 7.4 | 2.4 | 7.5 | 8.3 | 6.1 | 8.1  | 7.8 | 7.9 | 3.6 | 3.2  | 7.7 | 7.9 | 7.6 | 3.1  | 6.5 | 7.6 | 8.3 | 8.2 | 8.2 | 7.5 | 7.5 | 9.0  | NaN  | 7.9  | 9.0  | 3.4 | 9.4  | 8.5  | 8.3 |
| LIPd-L | 7.9 | 7.9 | 9.1 | 6.5 | 7.9 | 9.6 | 6.1 | 8.7  | 8.4 | 5.6 | 8.6 | 9.1  | 7.0 | 3.8 | 6.5 | 10.0 | 8.2 | 5.3 | 8.3 | 8.1 | 5.0 | 3.4 | 6.6 | 6.5  | 6.7  | NaN  | 8.6  | 6.0 | 7.3  | 8.5  | 7.8 |
| FOP4-L | 9.3 | 3.9 | 3.6 | 3.2 | 7.9 | 2.9 | 1.8 | 4.3  | 8.6 | 5.4 | 4.1 | 3.9  | 6.2 | 3.9 | 3.3 | 3.1  | 8.0 | 3.7 | 3.4 | 8.8 | 3.3 | 7.1 | 3.9 | 4.2  | 4.4  | 3.6  | NaN  | 4.5 | 4.3  | 3.6  | 4.9 |
| AVI-L  | 6.1 | 6.4 | 8.6 | 4.7 | 5.9 | 6.0 | 4.2 | 7.4  | 8.4 | 8.4 | 6.5 | 7.1  | 4.6 | 6.9 | 6.0 | 5.6  | 6.7 | 5.3 | 7.6 | 6.0 | 4.3 | 5.8 | 7.6 | 8.2  | 6.7  | 6.2  | 9.1  | NaN | 5.7  | 6.5  | 9.0 |
| Pft    | 8.2 | 8.2 | 7.4 | 5.7 | 8.9 | 4.2 | 6.8 | 8.8  | 8.5 | 5.0 | 5.3 | 9.2  | 7.3 | 4.9 | 8.6 | 6.5  | 8.6 | 7.0 | 7.1 | 9.6 | 7.5 | 7.2 | 6.3 | 10.0 | 10.4 | 10.9 | 10.8 | 4.8 | NaN  | 12.0 | 8.3 |
| IP2-L  | 9.4 | 9.1 | 7.2 | 6.5 | 8.3 | 9.4 | 6.8 | 10.6 | 8.4 | 7.1 | 8.2 | 10.3 | 7.7 | 5.4 | 8.8 | 11.8 | 8.6 | 6.3 | 9.2 | 7.6 | 8.4 | 7.4 | 8.4 | 8.7  | 8.0  | 9.6  | 8.5  | 8.4 | 9.6  | NaN  | 9.9 |
| FOP5   | 7.4 | 6.9 | 8.0 | 5.5 | 7.0 | 6.5 | 5.1 | 7.6  | 7.3 | 7.8 | 2.4 | 7.8  | 5.4 | 3.4 | 7.0 | 2.0  | 7.5 | 2.3 | 7.0 | 8.1 | 7.2 | 6.9 | 7.6 | 7.9  | 7.0  | 7.0  | 9.8  | 8.5 | 5.6  | 8.1  | NaN |

**TABLE S4: Effective connectivity (DCM) for schizophrenia patients (N=66) during WM manipulation.** T-values of effective connectivity across the 31 cortical parcels most engaged during WM manipulation. Rows represent connectivity “to” that region, while columns represent connectivity “from” that region. Regions are annotated according to the Human Connectome Project (HCP) parcellations(1). In bold are the left 46 and LIPd regions-of-interest corresponding to previous connectivity findings associated with dysfunctional context updating and delusions(2) that are examined in the independent samples herein.

|        | SCEF | a24pr | 44-R | IFJp-R | IFSp | 46v | a10p | LIPd-R | FOP4-R | AVI-R | AIP | IP2-R | P10p | a32pr | SFL | 7PC | P32pr | 8BM | 44-L | 47l | 6r  | IFJa | IFJp-L | p9-46v | 46  | LIPd-L | FOP4-L | AVI-L | PfT | IP2-L | FOP5 |
|--------|------|-------|------|--------|------|-----|------|--------|--------|-------|-----|-------|------|-------|-----|-----|-------|-----|------|-----|-----|------|--------|--------|-----|--------|--------|-------|-----|-------|------|
| SCEF   | NaN  | 3.8   | 3.5  | 4.2    | 3.9  | 4.2 | 3.6  | 4.0    | 4.5    | 5.2   | 4.7 | 4.4   | 3.6  | 4.6   | 2.9 | 4.5 | 4.1   | 4.6 | 4.4  | 3.2 | 4.7 | 4.1  | 3.6    | 4.7    | 5.0 | 4.5    | 4.5    | 4.7   | 4.6 | 3.8   | 4.8  |
| a24pr  | 3.8  | NaN   | 2.2  | 2.9    | 2.9  | 2.2 | 2.8  | 3.6    | 4.3    | 4.0   | 4.0 | 2.7   | 3.6  | 4.5   | 2.3 | 3.0 | 4.7   | 3.5 | 3.3  | 3.1 | 2.0 | 2.7  | 3.7    | 3.6    | 4.7 | 3.5    | 4.5    | 4.6   | 4.5 | 2.8   | 4.3  |
| 44-R   | 3.6  | 2.4   | NaN  | 3.7    | 4.2  | 4.4 | 3.4  | 3.5    | 2.4    | 4.6   | 3.3 | 5.1   | 4.1  | 3.2   | 4.4 | 4.4 | 1.6   | 3.3 | 4.2  | 3.1 | 5.1 | 4.1  | 4.1    | 3.6    | 3.2 | 4.6    | 2.5    | 3.0   | 4.0 | 4.6   | 3.5  |
| IFJp-R | 4.4  | 3.0   | 3.4  | NaN    | 3.3  | 3.3 | 3.0  | 3.3    | 3.8    | 3.7   | 4.4 | 4.8   | 3.5  | 3.4   | 3.2 | 4.0 | 2.9   | 3.0 | 3.2  | 3.8 | 3.9 | 3.8  | 3.5    | 3.3    | 3.5 | 3.9    | 3.9    | 4.5   | 3.7 | 4.4   | 3.9  |
| IFSp   | 3.7  | 2.7   | 4.4  | 3.5    | NaN  | 4.7 | 3.2  | 3.5    | 2.9    | 3.7   | 3.8 | 4.5   | 4.0  | 2.8   | 3.3 | 3.9 | 2.7   | 2.9 | 4.4  | 3.9 | 4.2 | 4.1  | 3.9    | 3.6    | 2.4 | 4.0    | 2.7    | 3.5   | 2.8 | 4.2   | 2.9  |
| 46v    | 4.0  | 2.8   | 4.5  | 3.7    | 5.4  | NaN | 4.3  | 3.5    | 2.6    | 4.5   | 3.8 | 4.9   | 4.0  | 2.4   | 3.5 | 5.4 | 2.4   | 4.1 | 4.9  | 2.9 | 4.8 | 4.4  | 4.4    | 4.6    | 3.7 | 3.9    | 2.7    | 3.7   | 3.2 | 4.5   | 2.4  |
| a10p   | 3.4  | 2.6   | 3.6  | 3.4    | 4.0  | 4.4 | NaN  | 3.0    | 2.5    | 4.0   | 2.9 | 4.1   | 3.8  | 2.5   | 3.0 | 3.1 | 2.4   | 3.9 | 4.0  | 2.8 | 3.7 | 3.1  | 3.6    | 1.9    | 3.0 | 3.6    | 2.6    | 3.1   | 2.2 | 3.6   | 2.5  |
| LIPd-R | 4.4  | 3.5   | 3.6  | 3.7    | 3.8  | 3.8 | 2.8  | NaN    | 3.7    | 4.2   | 3.8 | 4.4   | 3.4  | 3.8   | 3.4 | 4.0 | 3.3   | 3.6 | 3.8  | 3.4 | 3.6 | 4.4  | 4.2    | 3.5    | 4.1 | 4.4    | 4.5    | 4.2   | 3.9 | 4.3   | 3.6  |
| FOP4-R | 4.6  | 3.8   | 1.7  | 4.4    | 2.8  | 3.1 | 1.5  | 4.0    | NaN    | 4.5   | 4.4 | 3.5   | 3.0  | 4.0   | 2.5 | 3.2 | 4.3   | 1.6 | 3.4  | 3.8 | 2.7 | 3.0  | 3.9    | 3.1    | 4.0 | 4.1    | 4.5    | 4.3   | 4.1 | 2.7   | 4.8  |
| AVI-R  | 5.0  | 3.9   | 4.7  | 4.2    | 4.1  | 4.8 | 3.6  | 4.0    | 3.7    | NaN   | 4.6 | 5.6   | 4.0  | 3.9   | 3.5 | 4.7 | 3.8   | 4.5 | 4.6  | 4.2 | 4.8 | 4.3  | 4.1    | 4.2    | 4.8 | 3.9    | 3.8    | 4.4   | 4.3 | 3.5   | 4.6  |
| AIP    | 5.0  | 4.1   | 3.5  | 4.4    | 3.9  | 4.2 | 2.8  | 3.9    | 4.2    | 4.9   | NaN | 4.4   | 3.5  | 4.3   | 3.4 | 5.2 | 3.6   | 3.1 | 4.1  | 3.9 | 3.7 | 4.4  | 4.4    | 3.7    | 4.3 | 4.8    | 4.6    | 4.3   | 4.3 | 4.8   | 4.3  |
| IP2-R  | 4.0  | 2.7   | 4.8  | 4.0    | 4.2  | 4.8 | 4.0  | 3.9    | 3.3    | 4.5   | 4.4 | NaN   | 3.8  | 2.7   | 3.4 | 5.0 | 2.7   | 4.6 | 4.9  | 3.9 | 4.7 | 4.7  | 4.2    | 4.5    | 3.6 | 4.6    | 3.6    | 3.8   | 4.0 | 5.0   | 3.9  |
| P10p   | 3.8  | 3.1   | 3.6  | 4.4    | 4.7  | 4.3 | 3.4  | 3.7    | 3.0    | 4.2   | 4.1 | 3.9   | NaN  | 3.1   | 3.7 | 2.6 | 2.8   | 3.5 | 3.7  | 3.4 | 4.2 | 4.0  | 4.4    | 2.6    | 3.0 | 4.1    | 3.4    | 4.0   | 3.9 | 3.6   | 3.5  |
| a32pr  | 4.5  | 4.9   | 3.5  | 3.7    | 3.0  | 2.4 | 2.6  | 4.1    | 4.2    | 3.8   | 4.4 | 3.1   | 3.6  | NaN   | 3.1 | 3.9 | 4.8   | 3.7 | 4.3  | 4.2 | 2.8 | 4.2  | 3.6    | 4.1    | 4.0 | 4.0    | 4.7    | 4.6   | 4.3 | 3.1   | 4.3  |
| SFL    | 3.0  | 3.0   | 4.4  | 3.3    | 3.8  | 3.7 | 2.4  | 3.4    | 3.0    | 3.5   | 3.7 | 4.1   | 3.4  | 3.2   | NaN | 4.0 | 2.9   | 3.6 | 4.3  | 3.5 | 4.6 | 3.5  | 3.9    | 2.9    | 2.2 | 3.9    | 3.4    | 3.0   | 3.0 | 3.3   | 2.6  |
| 7PC    | 4.8  | 3.3   | 4.2  | 3.9    | 4.7  | 5.2 | 2.9  | 4.6    | 3.4    | 4.7   | 4.8 | 5.3   | 3.1  | 3.3   | 4.0 | NaN | 2.5   | 3.5 | 4.7  | 4.2 | 3.9 | 4.0  | 4.3    | 3.3    | 2.7 | 5.8    | 3.6    | 4.2   | 3.0 | 5.9   | 3.2  |
| P32pr  | 4.4  | 5.1   | 2.3  | 2.8    | 1.9  | 2.0 | 2.2  | 3.9    | 4.8    | 4.1   | 3.8 | 2.8   | 3.0  | 4.5   | 1.9 | 2.6 | NaN   | 3.4 | 3.5  | 2.8 | 2.1 | 3.0  | 3.5    | 3.8    | 4.6 | 3.4    | 4.6    | 4.6   | 4.1 | 2.5   | 4.5  |
| 8BM    | 4.0  | 3.0   | 4.0  | 3.2    | 3.4  | 3.7 | 3.6  | 3.8    | 2.2    | 4.0   | 3.6 | 4.2   | 3.8  | 3.6   | 3.4 | 3.6 | 3.1   | NaN | 4.4  | 2.9 | 4.3 | 4.5  | 4.3    | 4.1    | 3.7 | 3.9    | 2.9    | 3.2   | 3.3 | 4.1   | 2.5  |
| 44-L   | 4.1  | 2.8   | 4.5  | 3.3    | 4.3  | 4.7 | 1.6  | 3.7    | 3.6    | 4.5   | 4.2 | 5.3   | 3.2  | 4.0   | 4.1 | 5.3 | 2.4   | 3.5 | NaN  | 4.3 | 5.0 | 5.1  | 5.0    | 3.3    | 2.5 | 5.1    | 3.6    | 2.8   | 2.9 | 5.0   | 3.9  |
| 47l    | 3.3  | 3.3   | 3.1  | 4.0    | 4.0  | 3.1 | 3.3  | 3.6    | 4.0    | 4.3   | 3.6 | 3.7   | 3.0  | 4.2   | 2.9 | 4.0 | 3.4   | 3.1 | 3.7  | NaN | 4.5 | 3.8  | 4.5    | 3.6    | 3.7 | 4.5    | 4.1    | 4.4   | 4.3 | 3.2   | 4.3  |
| 6r     | 4.7  | 2.2   | 5.3  | 3.3    | 4.7  | 5.3 | 3.9  | 4.1    | 3.1    | 4.6   | 4.2 | 5.3   | 3.6  | 3.1   | 3.8 | 4.1 | 2.6   | 4.4 | 5.7  | 4.2 | NaN | 4.7  | 4.7    | 3.5    | 2.2 | 4.7    | 2.9    | 3.7   | 3.1 | 5.0   | 3.1  |

|        |     |     |     |     |     |     |     |     |     |     |     |     |     |     |     |     |     |     |     |     |     |     |     |     |     |     |     |     |     |     |     |
|--------|-----|-----|-----|-----|-----|-----|-----|-----|-----|-----|-----|-----|-----|-----|-----|-----|-----|-----|-----|-----|-----|-----|-----|-----|-----|-----|-----|-----|-----|-----|-----|
| IFJa   | 4.0 | 3.3 | 5.0 | 4.4 | 4.4 | 5.0 | 3.3 | 3.4 | 3.3 | 4.4 | 4.0 | 5.4 | 3.8 | 3.3 | 3.6 | 4.1 | 2.6 | 4.0 | 5.2 | 3.6 | 4.8 | NaN | 5.1 | 4.5 | 3.4 | 4.1 | 4.0 | 3.9 | 4.0 | 4.5 | 3.5 |
| IFJp-L | 3.6 | 3.3 | 4.2 | 4.1 | 4.3 | 5.2 | 3.7 | 4.0 | 4.3 | 4.2 | 4.4 | 4.9 | 3.8 | 3.8 | 4.1 | 4.0 | 3.7 | 4.2 | 4.9 | 4.2 | 5.0 | 5.4 | NaN | 4.6 | 4.0 | 4.4 | 4.4 | 4.1 | 4.3 | 4.8 | 4.1 |
| p9-46v | 4.3 | 3.5 | 4.3 | 3.0 | 4.4 | 4.5 | 2.6 | 3.8 | 3.6 | 4.2 | 4.1 | 4.5 | 3.0 | 3.6 | 3.4 | 3.1 | 3.5 | 4.5 | 4.1 | 3.5 | 4.0 | 4.8 | 4.6 | NaN | 2.8 | 4.0 | 3.5 | 4.4 | 3.2 | 3.9 | 3.1 |
| 46     | 4.6 | 4.1 | 3.4 | 3.3 | 2.7 | 3.7 | 2.5 | 4.2 | 4.0 | 4.5 | 3.9 | 3.3 | 2.5 | 4.4 | 3.3 | 2.6 | 4.4 | 3.8 | 2.9 | 3.7 | 2.5 | 3.4 | 4.0 | 2.6 | NaN | 3.4 | 4.2 | 3.8 | 4.3 | 3.0 | 4.2 |
| LIPd-L | 4.4 | 2.9 | 4.6 | 3.9 | 4.4 | 4.5 | 3.6 | 4.4 | 3.9 | 4.8 | 5.3 | 5.1 | 4.2 | 4.1 | 4.5 | 5.9 | 3.3 | 4.4 | 4.7 | 4.5 | 5.6 | 4.2 | 4.6 | 4.5 | 4.2 | NaN | 3.8 | 4.7 | 5.1 | 5.5 | 4.7 |
| FOP4-L | 4.4 | 4.1 | 3.4 | 3.6 | 2.8 | 3.5 | 2.3 | 4.3 | 4.5 | 4.4 | 4.7 | 4.1 | 3.6 | 4.3 | 3.0 | 3.4 | 4.1 | 2.8 | 3.6 | 4.1 | 3.1 | 3.7 | 4.1 | 3.4 | 4.6 | 3.9 | NaN | 4.9 | 5.5 | 3.8 | 4.8 |
| AVI-L  | 5.2 | 4.9 | 3.1 | 3.6 | 3.2 | 2.8 | 2.8 | 4.1 | 4.2 | 4.9 | 4.0 | 3.1 | 3.2 | 4.4 | 2.4 | 3.3 | 3.8 | 3.5 | 3.6 | 3.7 | 2.9 | 3.2 | 4.2 | 3.6 | 4.2 | 4.7 | 5.0 | NaN | 4.8 | 3.6 | 4.4 |
| Pft    | 4.1 | 4.5 | 3.9 | 3.6 | 2.9 | 3.5 | 2.1 | 3.9 | 4.7 | 4.3 | 5.0 | 4.0 | 3.2 | 4.5 | 2.5 | 3.5 | 4.5 | 3.6 | 3.4 | 4.3 | 1.4 | 3.8 | 4.1 | 1.4 | 0.6 | 4.5 | 4.8 | 4.5 | NaN | 5.0 | 4.8 |
| IP2-L  | 4.5 | 2.9 | 5.0 | 4.0 | 4.1 | 5.3 | 3.5 | 4.4 | 3.0 | 4.3 | 4.5 | 5.8 | 4.0 | 3.6 | 4.1 | 6.1 | 2.7 | 4.5 | 4.7 | 3.8 | 5.3 | 4.9 | 4.8 | 4.5 | 3.3 | 4.9 | 3.4 | 4.0 | 5.0 | NaN | 3.1 |
| FOP5   | 4.4 | 4.8 | 3.3 | 4.3 | 3.4 | 2.7 | 2.2 | 4.4 | 4.4 | 4.3 | 4.4 | 3.4 | 3.1 | 3.5 | 2.5 | 3.4 | 4.5 | 2.5 | 4.2 | 4.8 | 3.2 | 4.0 | 4.4 | 3.5 | 4.4 | 4.5 | 5.4 | 5.0 | 4.5 | 3.4 | NaN |

**TABLE S5: Effective connectivity (DCM) for schizophrenia patients (N=66) during WM maintenance:** T-values of effective connectivity across the 31 cortical parcels most engaged during WM maintenance. Rows represent connectivity “to” that region, while columns represent connectivity “from” that region. Regions are annotated according to the Human Connectome Project (HCP) parcellations(1).

|        | SCEF | a24pr | 44-R | IFJp-R | IFSp | 46v  | a10p | LIPd-R | FOP4-R | AVI-R | AIP | IP2-R | P10p | a32pr | SFL  | 7PC | P32pr | 8BM  | 44-L | 47l  | 6r   | IFJa | IFJp-L | p9-46v | 46   | LIPd-L | FOP4-L | AVI-L | PfT | IP2-L | FOP5 |
|--------|------|-------|------|--------|------|------|------|--------|--------|-------|-----|-------|------|-------|------|-----|-------|------|------|------|------|------|--------|--------|------|--------|--------|-------|-----|-------|------|
| SCEF   | NaN  | 5.1   | 5.9  | 1.2    | 3.8  | 3.5  | 1.9  | 1.7    | 6.0    | 5.3   | 2.5 | 4.7   | 2.0  | 4.8   | 5.6  | 3.9 | 5.4   | 4.4  | 0.3  | 3.9  | 4.3  | 5.3  | 3.1    | 0.7    | 3.4  | 5.5    | 5.5    | 5.3   | 2.0 | 1.6   | 5.9  |
| a24pr  | 5.7  | NaN   | 6.1  | 5.1    | 4.3  | 4.9  | 1.8  | 5.3    | 5.4    | 5.1   | 5.6 | 5.0   | 3.6  | 5.6   | 4.3  | 4.1 | 4.9   | 4.7  | 5.1  | 3.8  | 5.8  | 5.5  | 4.6    | 3.4    | 3.3  | 5.1    | 5.2    | 4.9   | 5.8 | 5.2   | 5.5  |
| 44-R   | 4.5  | 5.3   | NaN  | 3.8    | 2.8  | -0.2 | 1.8  | 5.1    | 5.4    | 1.5   | 1.6 | 0.3   | 1.7  | 5.2   | 1.1  | 3.6 | 5.9   | 4.3  | 0.8  | 3.8  | 0.6  | 3.1  | 0.9    | 3.7    | 4.4  | 5.6    | 1.0    | 5.4   | 5.0 | 4.9   | 1.3  |
| IFJp-R | 2.2  | 5.0   | 0.2  | NaN    | 4.4  | 0.7  | 1.6  | 1.0    | 4.6    | 3.9   | 1.5 | 0.8   | 1.9  | 3.4   | 4.6  | 3.3 | 4.3   | 3.8  | 5.3  | 3.1  | 4.6  | 4.8  | 4.8    | 2.3    | 2.9  | 5.1    | 4.2    | 4.7   | 4.3 | 0.7   | 1.0  |
| IFSp   | -0.2 | 3.8   | -0.4 | 0.4    | NaN  | -0.2 | 1.1  | -1.0   | 0.8    | -0.2  | 1.3 | -0.7  | 1.3  | 3.5   | -1.0 | 0.2 | 0.4   | -1.2 | -1.0 | -0.1 | -1.6 | -1.0 | -1.4   | -0.2   | 3.0  | -0.4   | -0.4   | -1.2  | 0.6 | -0.9  | -0.2 |
| 46v    | -0.5 | 4.3   | 0.1  | -0.5   | 4.0  | NaN  | 1.9  | 0.1    | 4.8    | 4.9   | 0.5 | -0.2  | 1.1  | 3.6   | -0.6 | 2.8 | 4.7   | 3.2  | -0.4 | 3.5  | -0.8 | -0.6 | -0.2   | 0.3    | 1.1  | -0.1   | 2.1    | 0.4   | 5.6 | -1.0  | 0.8  |
| a10p   | 0.7  | 0.9   | 0.7  | 0.7    | 0.2  | 0.6  | NaN  | 1.2    | 1.6    | 0.4   | 1.2 | 0.7   | 1.5  | 1.3   | 1.1  | 1.3 | 0.0   | 0.1  | 1.2  | 2.2  | 1.6  | 0.5  | 1.1    | 1.2    | 1.4  | 0.8    | 0.2    | 0.2   | 2.3 | 1.5   | 1.0  |
| LIPd-R | 1.4  | 4.9   | 2.1  | 1.2    | 0.7  | 1.4  | 1.6  | NaN    | 4.9    | 5.4   | 1.1 | 4.5   | 2.0  | 4.1   | 1.2  | 1.3 | 4.7   | 4.0  | 1.4  | 3.9  | 1.6  | 1.3  | 4.7    | 0.7    | 3.8  | 6.2    | 3.6    | 5.3   | 0.6 | 1.4   | 5.0  |
| FOP4-R | 5.8  | 4.8   | 5.4  | 4.4    | 4.4  | 5.0  | 2.1  | 4.5    | NaN    | 6.1   | 5.7 | 4.5   | 2.8  | 4.8   | 4.4  | 4.4 | 5.6   | 4.2  | 6.2  | 4.2  | 5.9  | 5.5  | 4.2    | 3.9    | 3.8  | 3.7    | 5.5    | 5.5   | 5.8 | 3.9   | 5.9  |
| AVI-R  | 6.1  | 4.8   | 6.5  | 4.2    | 4.5  | 5.6  | 1.8  | 5.3    | 6.0    | NaN   | 6.6 | 5.2   | 2.5  | 4.8   | 5.3  | 4.7 | 5.6   | 4.6  | 5.0  | 4.3  | 6.5  | 1.3  | 5.8    | 4.7    | 4.6  | 5.4    | 5.4    | 4.8   | 6.0 | 5.1   | 5.4  |
| AIP    | 6.1  | 5.1   | 6.5  | 4.9    | 4.6  | 5.3  | 2.1  | 4.6    | 5.8    | 6.3   | NaN | 5.1   | 2.1  | 4.0   | 1.7  | 4.9 | 5.6   | 4.9  | 6.3  | 4.3  | 6.5  | 6.6  | 6.6    | 1.3    | 4.4  | 6.5    | 5.4    | 6.5   | 1.5 | 1.7   | 5.8  |
| IP2-R  | 4.8  | 4.8   | 4.9  | 4.1    | 3.9  | 4.3  | 1.9  | 1.5    | 4.8    | 5.1   | 1.8 | NaN   | 2.6  | 3.8   | 4.9  | 3.8 | 4.6   | 4.0  | 4.3  | 4.0  | 5.9  | 5.2  | 5.1    | 4.2    | -0.3 | 5.4    | 5.5    | 4.9   | 4.8 | 0.2   | 2.4  |
| P10p   | 2.0  | 2.9   | 1.8  | 1.5    | 1.8  | 1.5  | 2.3  | 1.3    | 1.9    | 1.8   | 1.9 | 2.1   | NaN  | 3.0   | 1.5  | 1.4 | 2.6   | 1.3  | 1.7  | 1.6  | 1.6  | 1.2  | 1.8    | 0.9    | 1.4  | 1.3    | 1.7    | 0.8   | 2.5 | 1.4   | 0.7  |
| a32pr  | 4.8  | 5.3   | 5.0  | 3.7    | 3.6  | 3.9  | 1.7  | 3.7    | 4.6    | 4.9   | 4.2 | 4.0   | 3.5  | NaN   | 4.2  | 3.1 | 4.8   | 4.3  | 4.8  | 4.0  | 4.3  | 4.5  | 4.5    | 2.7    | 3.3  | 5.1    | 4.6    | 4.6   | 4.8 | 3.9   | 4.7  |
| SFL    | 1.5  | 0.9   | 2.0  | 4.3    | 0.2  | 0.4  | 2.2  | 1.3    | 4.7    | 5.0   | 5.3 | 4.7   | 2.3  | 0.6   | NaN  | 3.5 | 1.1   | -0.1 | 1.0  | 3.7  | 0.5  | 1.4  | 1.3    | 4.2    | 4.4  | 1.4    | 0.8    | 1.1   | 1.3 | 1.4   | 1.5  |
| 7PC    | 4.8  | 3.8   | 1.2  | 0.5    | 0.7  | 0.3  | 2.5  | 1.2    | 4.4    | 4.3   | 1.7 | 3.5   | 2.3  | 3.4   | 4.0  | NaN | 4.4   | 0.7  | 0.4  | 2.9  | 1.3  | 0.8  | 0.9    | 0.3    | 3.8  | 0.9    | 2.8    | 4.4   | 5.2 | 1.0   | 3.5  |
| P32pr  | 5.6  | 5.3   | 6.5  | 4.5    | 3.8  | 5.6  | 1.7  | 4.9    | 5.5    | 6.1   | 6.0 | 4.6   | 3.0  | 4.9   | 5.3  | 4.9 | NaN   | 5.1  | 6.8  | 4.8  | 6.8  | 5.9  | 6.3    | 4.4    | 4.1  | 6.1    | 6.2    | 6.4   | 6.3 | 5.5   | 6.1  |
| 8BM    | 1.2  | 0.9   | 1.9  | 0.8    | -0.5 | 4.2  | 1.1  | 1.1    | 4.2    | 5.1   | 4.9 | 4.2   | 1.8  | 1.1   | 1.2  | 4.0 | 1.0   | NaN  | 0.5  | 3.6  | 1.5  | -0.4 | 1.7    | 3.6    | 3.0  | 1.2    | 0.6    | 1.1   | 1.1 | 1.0   | 1.2  |
| 44-L   | 0.3  | 1.1   | 0.5  | 1.6    | 0.9  | 0.5  | 2.3  | 1.6    | 5.7    | 1.0   | 2.3 | -0.7  | 2.0  | 1.1   | 0.6  | 3.3 | 6.2   | -0.2 | NaN  | 4.5  | -0.9 | -0.4 | -0.6   | 1.2    | 4.8  | 1.3    | 4.4    | 1.3   | 1.8 | 0.2   | 1.6  |
| 47l    | 0.6  | 0.5   | 1.3  | 3.4    | 0.2  | 3.8  | 2.2  | 3.2    | 4.1    | 4.4   | 4.0 | 3.4   | 1.7  | 0.6   | 0.7  | 3.1 | 4.5   | 0.9  | 4.6  | NaN  | 1.4  | 0.8  | 1.2    | 3.9    | 3.5  | 0.6    | 4.0    | 0.0   | 0.7 | 0.7   | 4.6  |
| 6r     | 0.0  | 5.1   | 0.1  | 0.3    | -0.1 | 0.9  | 2.2  | 0.0    | 5.8    | 6.0   | 1.4 | 2.3   | 0.0  | 5.1   | -0.3 | 0.4 | 5.8   | -0.5 | -0.7 | 1.4  | NaN  | -0.2 | -0.4   | -0.1   | 1.4  | 5.5    | 1.8    | 1.3   | 2.1 | 1.4   | 0.7  |
| IFJa   | 1.6  | 5.4   | 0.6  | 1.7    | 0.9  | 1.0  | 1.6  | 1.6    | 5.8    | 4.9   | 2.6 | 1.7   | -0.1 | 4.8   | 0.6  | 4.1 | 5.6   | 2.5  | 4.7  | 4.3  | 5.2  | NaN  | 1.9    | 2.4    | 1.0  | 5.9    | 3.9    | 5.0   | 5.7 | 1.4   | 1.6  |



|        |     |     |     |      |     |      |     |     |     |     |     |     |     |     |      |     |     |     |      |     |      |      |     |     |      |     |     |     |     |     |      |
|--------|-----|-----|-----|------|-----|------|-----|-----|-----|-----|-----|-----|-----|-----|------|-----|-----|-----|------|-----|------|------|-----|-----|------|-----|-----|-----|-----|-----|------|
| IFIp-L | 0.5 | 1.1 | 1.6 | 0.6  | 0.9 | 1.3  | 1.9 | 1.2 | 4.7 | 2.7 | 3.1 | 2.4 | 0.5 | 4.5 | 0.6  | 0.9 | 6.0 | 0.4 | 2.2  | 1.5 | 1.2  | 0.8  | NaN | 1.3 | 1.2  | 1.8 | 1.8 | 1.6 | 5.6 | 0.8 | 6.4  |
| p9-46v | 0.2 | 3.0 | 0.2 | -0.8 | 2.3 | 0.1  | 2.0 | 0.3 | 3.6 | 4.7 | 0.8 | 1.0 | 1.0 | 2.6 | -0.3 | 3.7 | 3.6 | 3.1 | -0.6 | 3.3 | -0.3 | -0.7 | 0.6 | NaN | -0.4 | 2.9 | 4.3 | 0.4 | 3.1 | 0.4 | -0.2 |
| 46     | 3.4 | 3.5 | 4.3 | 2.6  | 3.1 | -0.1 | 1.9 | 4.1 | 3.7 | 4.1 | 4.6 | 1.9 | 1.7 | 3.0 | 3.3  | 3.7 | 3.7 | 2.7 | 0.8  | 3.5 | -0.1 | 3.0  | 2.3 | 3.8 | NaN  | 4.0 | 3.7 | 4.4 | 3.9 | 3.9 | 4.1  |
| LIPd-L | 2.5 | 4.9 | 2.7 | 2.0  | 1.1 | 1.8  | 1.9 | 2.5 | 5.2 | 5.9 | 6.9 | 5.3 | 1.6 | 4.8 | 1.9  | 4.0 | 5.6 | 1.4 | 1.9  | 4.0 | 2.9  | 2.4  | 2.4 | 1.5 | 3.9  | NaN | 4.9 | 6.1 | 2.5 | 5.8 | 5.8  |
| FOP4-L | 5.6 | 4.6 | 4.6 | 4.1  | 3.0 | 5.3  | 1.4 | 4.8 | 5.3 | 5.8 | 5.6 | 5.4 | 1.4 | 4.4 | 4.1  | 3.7 | 5.6 | 0.8 | 1.9  | 3.9 | 2.1  | 1.2  | 5.7 | 4.6 | 4.0  | 5.5 | NaN | 5.5 | 4.7 | 5.0 | 5.8  |
| AVI-L  | 1.4 | 4.4 | 6.0 | 4.8  | 3.1 | 4.4  | 1.4 | 5.3 | 5.1 | 5.8 | 6.1 | 5.1 | 1.5 | 4.3 | 3.7  | 3.5 | 5.8 | 3.6 | 5.4  | 4.6 | 5.6  | 5.2  | 1.8 | 4.7 | 4.2  | 6.0 | 5.7 | NaN | 6.0 | 1.1 | 5.8  |
| PFt    | 6.7 | 4.9 | 2.2 | 4.2  | 0.9 | 1.8  | 3.2 | 5.5 | 5.6 | 5.9 | 6.1 | 5.6 | 2.5 | 4.7 | 5.2  | 3.9 | 5.5 | 4.8 | 5.2  | 4.2 | 6.6  | 5.7  | 6.1 | 3.3 | 4.7  | 5.8 | 4.2 | 6.0 | NaN | 5.5 | 5.8  |
| IP2-L  | 1.9 | 5.2 | 2.4 | 1.7  | 1.1 | 1.0  | 2.0 | 2.0 | 4.9 | 5.3 | 5.0 | 4.1 | 2.4 | 4.0 | 1.6  | 1.8 | 4.8 | 1.1 | 1.4  | 3.8 | 2.2  | 1.8  | 1.7 | 1.1 | 3.4  | 1.9 | 5.0 | 5.2 | 2.2 | NaN | 5.4  |
| FOP5   | 5.7 | 5.2 | 5.9 | 3.9  | 4.1 | 4.8  | 2.0 | 1.6 | 5.4 | 5.7 | 2.4 | 1.7 | 2.3 | 5.0 | 4.8  | 3.5 | 6.2 | 4.4 | 5.5  | 4.8 | 6.2  | 5.8  | 5.9 | 4.6 | 4.5  | 5.8 | 5.7 | 5.4 | 5.6 | 4.8 | NaN  |

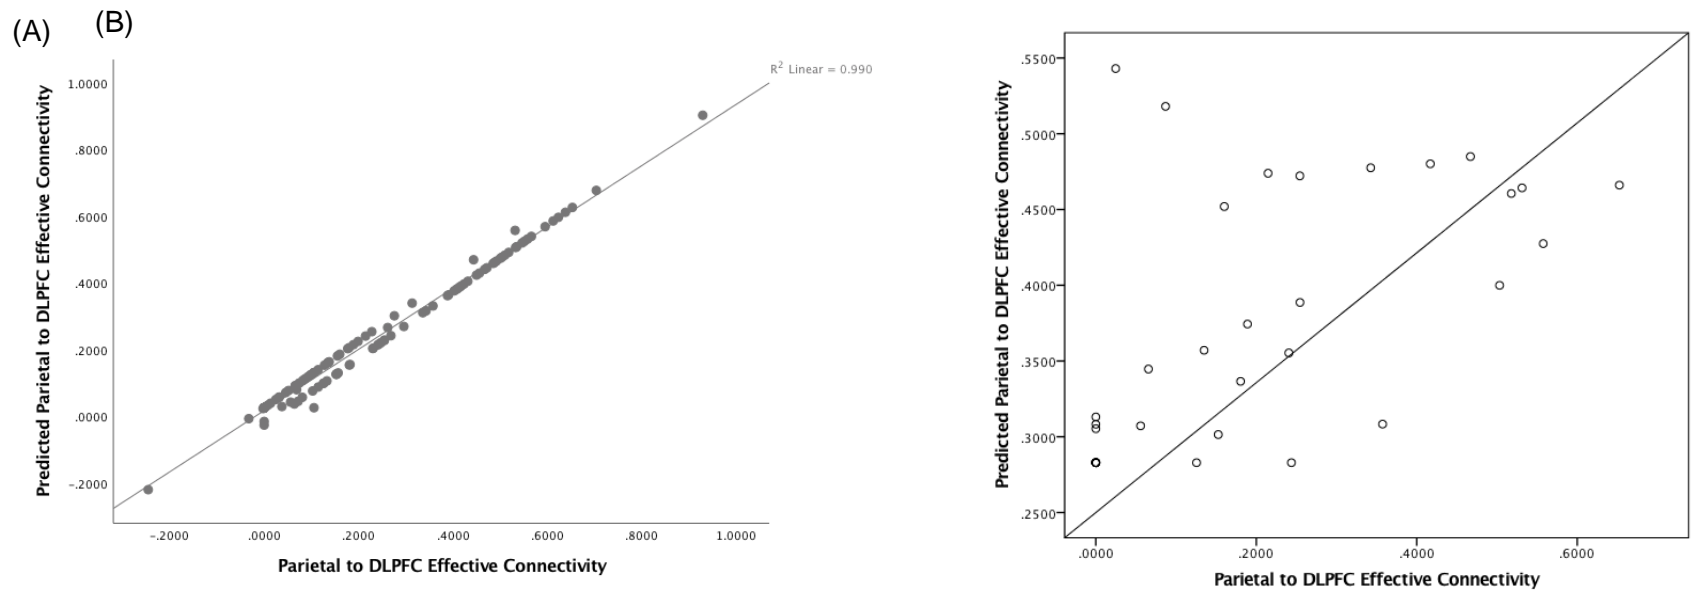

**FIGURE S1: Modeled parietal-prefrontal effective connectivity.**

Correspondence with actual effective connectivity, in healthy controls ( $N=143$ ,  $r=0.9$ ,  $p<0.001$ ), of leave-one-out predicted feedforward parietal-prefrontal effective connectivity during context updating in WM manipulation, derived from parietal and prefrontal effective connectivity patterns during WM maintenance using support vector regression models. As noted in the main text, a more conservative SVR model with 4/5 of the healthy sample ( $N=116$ ) and testing on a held out 1/5 sample also gave robust predictions ( $N=27$ ,  $r>0.8$ ,  $p<0.001$ ; Fig 1 in main text). (B) Elastic net regularization and variable selection ( $\alpha$  0.5), which effectively tackles model fitting with number of variables exceeding subjects, yielded connectivity predictions in the held out sample with a reasonably similar effect size as the SVR with a held out sample ( $N=27$ ,  $r=0.60$ ,  $p<0.001$ ).

### Supplementary References

1. Glasser MF, *et al.* (2016) A multi-modal parcellation of human cerebral cortex. *Nature* 536:171.
2. Kaplan C.M., *et al.* (2016) Estimating changing contexts in schizophrenia. *Brain* 139:2082-2095.
